# Supplementary material for: A novel needle trap device coupled with gas chromatography for determination of five fatty alcohols in tea samples
Source: Royal Society of Chemistry journal article supplement (doi:10.1039/c8ay01894d), 2018-01-01
Supplement: c8ay01894d1.pdf [file c8ay01894d1.pdf]

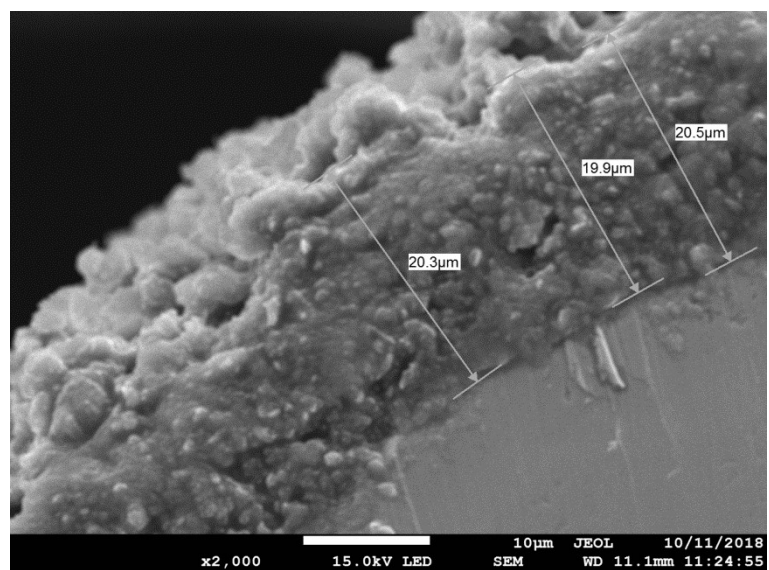

Fig. S1 The thickness of PANI-HILs-Au coating.

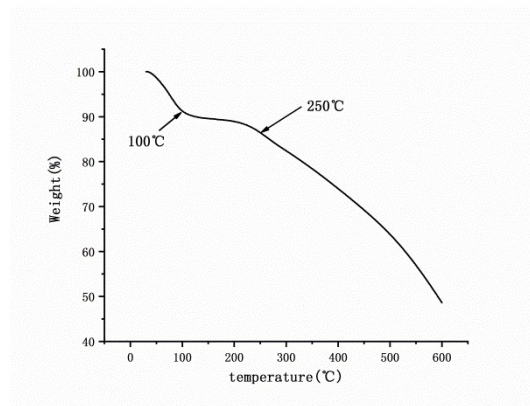

Fig. S2. TGA curves of PANI-HILs-Au coating.

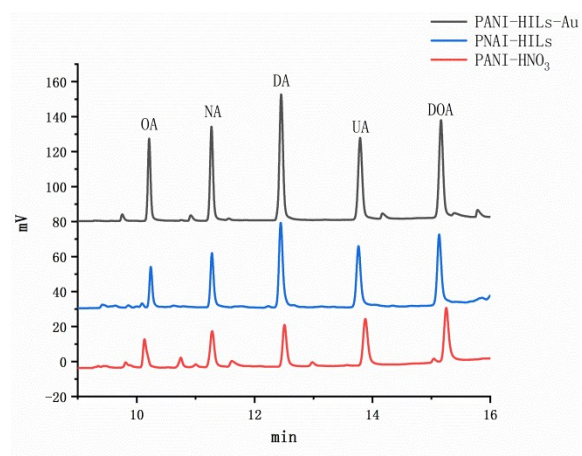

Fig. S3. Comparison of extraction effects of three coatings.
